# Supplementary material for: Construction of thermally stable Tb3+-activated green-emitting phosphors: dual driving strategy of doping concentration and excitation wavelength
Source: Royal Society of Chemistry journal article supplement (doi:10.1039/d3dt04255c), 2024-01-01
Supplement: d3dt04255c1.pdf [file d3dt04255c1.pdf]

# Supporting Information

Construction of thermally stable Tb<sup>3+</sup>-activated green-emitting phosphors:  
doping concentration and excitation wavelength dual driving strategy

Die Hu,<sup>a,b</sup> Ran Xiao,<sup>a</sup> Xiang Lv,<sup>a</sup> Chunwei Yang,<sup>a</sup> Jianxia Liu,<sup>a</sup> Yuefeng Zhao,<sup>a</sup> Ning Guo,<sup>a,\*</sup>

<sup>a</sup> Department of Chemistry, University of Shanghai for Science and Technology, Shanghai 200093,  
P. R. China.

<sup>b</sup> Institute of Photonic Chips, University of Shanghai for Science and Technology, Shanghai 200093,  
P. R. China.

\*Corresponding author: E-mail: [guoning@usst.edu.cn](mailto:guoning@usst.edu.cn)

# Figure S1

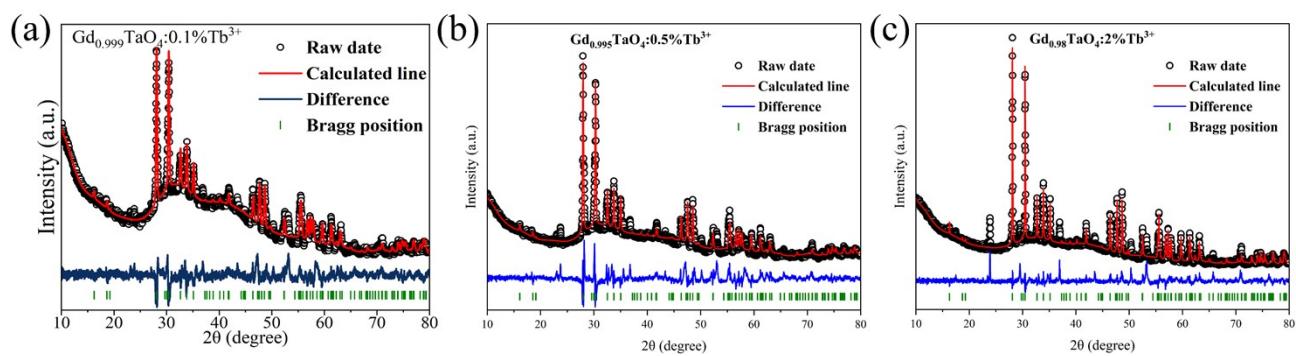

**Figure S1.** Rietveld refinement patterns for X-ray diffraction patterns of (a)  $\text{Gd}_{0.999}\text{TaO}_4:0.1\%\text{Tb}^{3+}$  (b)  $\text{Gd}_{0.995}\text{TaO}_4:0.5\%\text{Tb}^{3+}$  (c)  $\text{Gd}_{0.98}\text{TaO}_4:2\%\text{Tb}^{3+}$ .

**Figure S2**

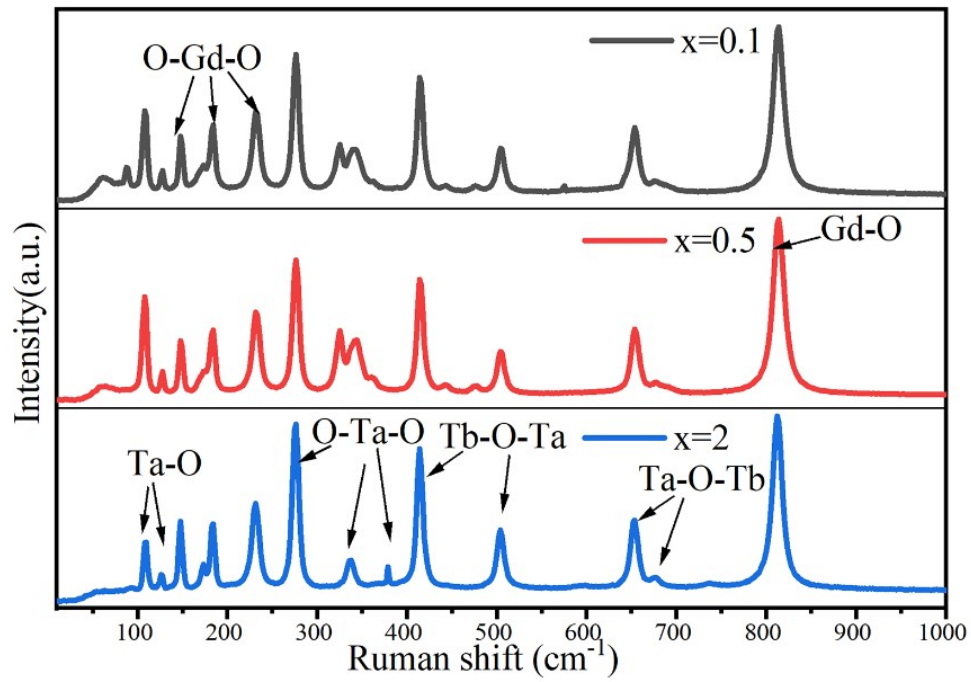

**Figure S2.** Raman spectra of  $\text{Gd}_{1-x}\text{TaO}_4:x\text{Tb}^{3+}$  ( $x = 0.1\%$ ,  $0.5\%$ ,  $2\%$ ).

**Figure S3**

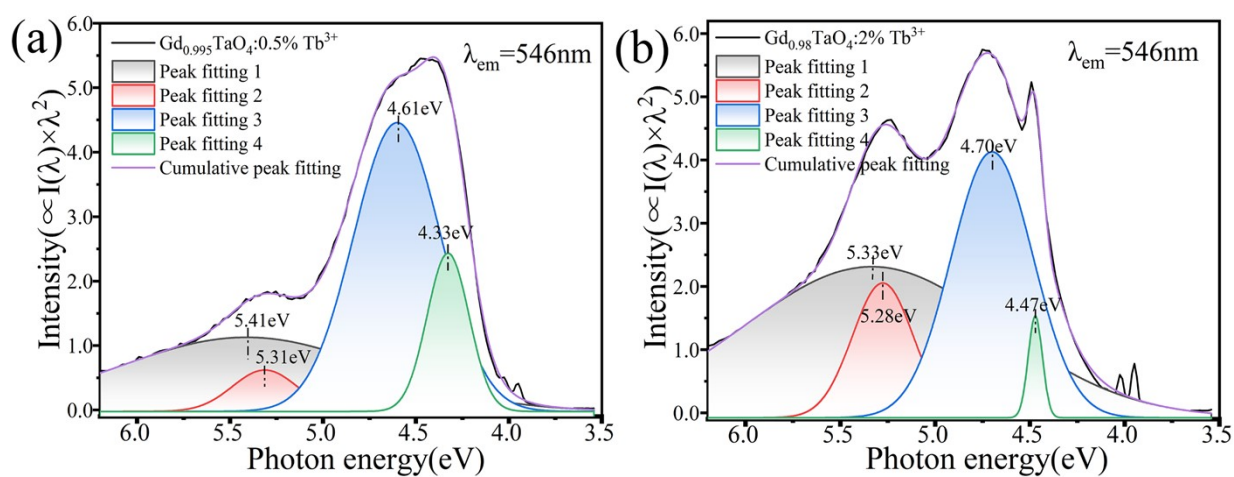

**Figure S3.** Gaussian fit to the excitation spectrum of photoluminescence of  $\text{Gd}_{0.999}\text{TaO}_4:0.1\% \text{Tb}^{3+}$ . The wavelength expressed in terms of photon energy (eV) is the horizontal coordinate.  $I(E) = I(\lambda) \times \lambda^2$ .

**Figure S4**

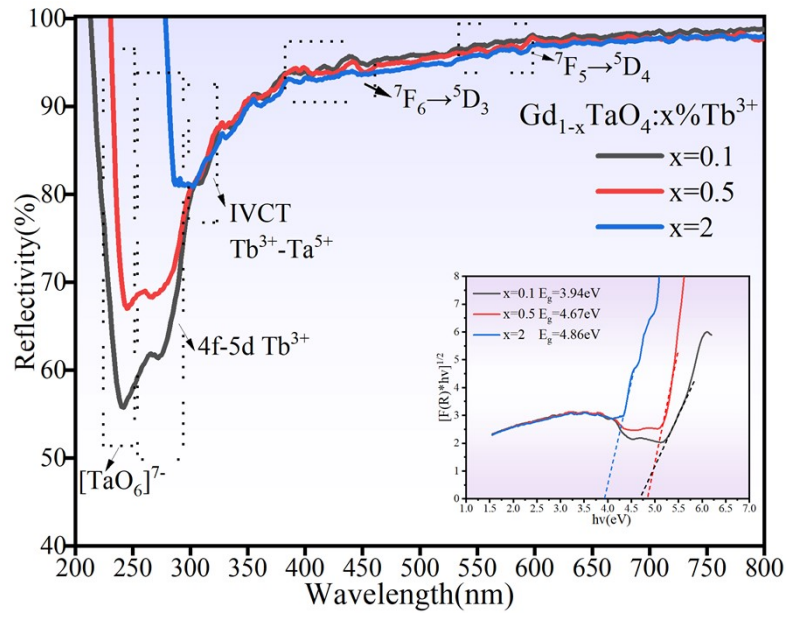

**Figure S4.** Diffuse reflectance spectrum of  $\text{Gd}_{1-x}\text{TaO}_4:x\% \text{Tb}^{3+}$  ( $x = 0.1\%$ ,  $0.5\%$ ,  $2\%$ ) and computed band gap spectrum fitted with Kubelka-Munk formula.

# Figure S5

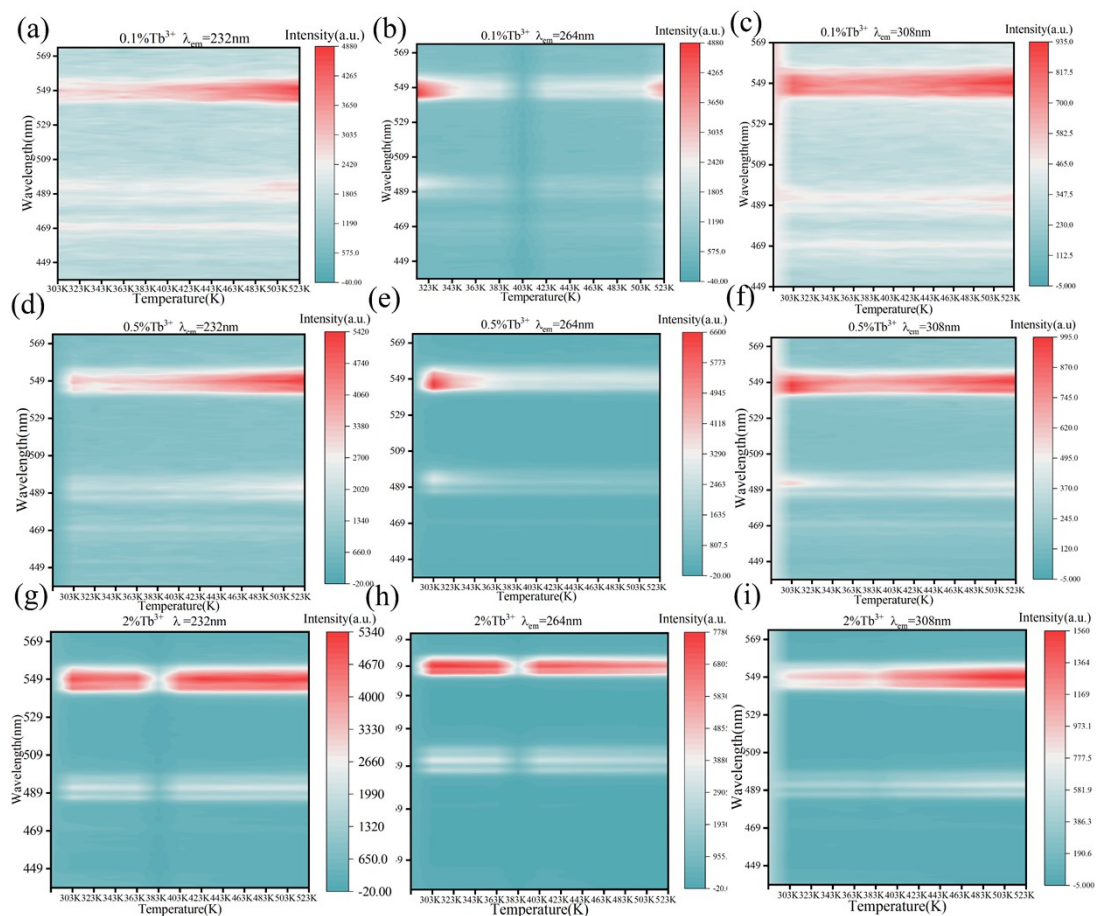

**Figure S5.** Contour plots of 303-523K variable temperature emission of  $\text{Gd}_{1-x}\text{TaO}_4:x\text{Tb}^{3+}$  ( $x = 0.1\%$ ,  $0.5\%$ ,  $2\%$ ) phosphor at 232, 264 and 308 nm at different excitation wavelengths (a-c:  $x = 0.1\%$ , d-f:  $x = 0.5\%$ , g-i:  $x = 2\%$ ).

# Figure S6

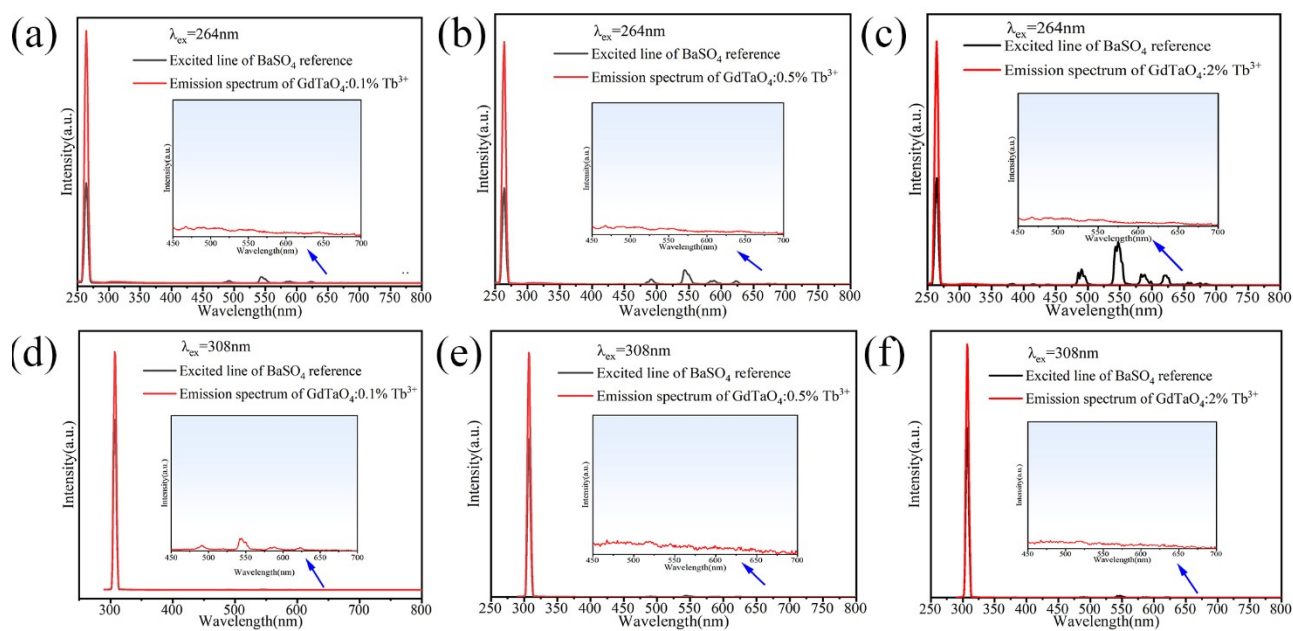

**Figure S6.** Excitation line of BaSO<sub>4</sub> and the emission spectrum of Gd<sub>1-x</sub>TaO<sub>4</sub>:xTb<sup>3+</sup> (x = 0.1%, 0.5%, 2%) phosphor. (a)  $\lambda_{\text{ex}}=264\text{nm}$  x=0.1%, (b)  $\lambda_{\text{ex}}=264\text{nm}$  x=0.5%, (c)  $\lambda_{\text{ex}}=264\text{nm}$  x=2%, (d)  $\lambda_{\text{ex}}=308\text{nm}$  x=0.1%, (e)  $\lambda_{\text{ex}}=308\text{nm}$  x=0.5%, (f)  $\lambda_{\text{ex}}=308\text{nm}$  x=2%. The data was collected by using an integrating sphere. The inset shows a magnification of the emission spectrum from 450 nm to 700 nm.

Figure S7

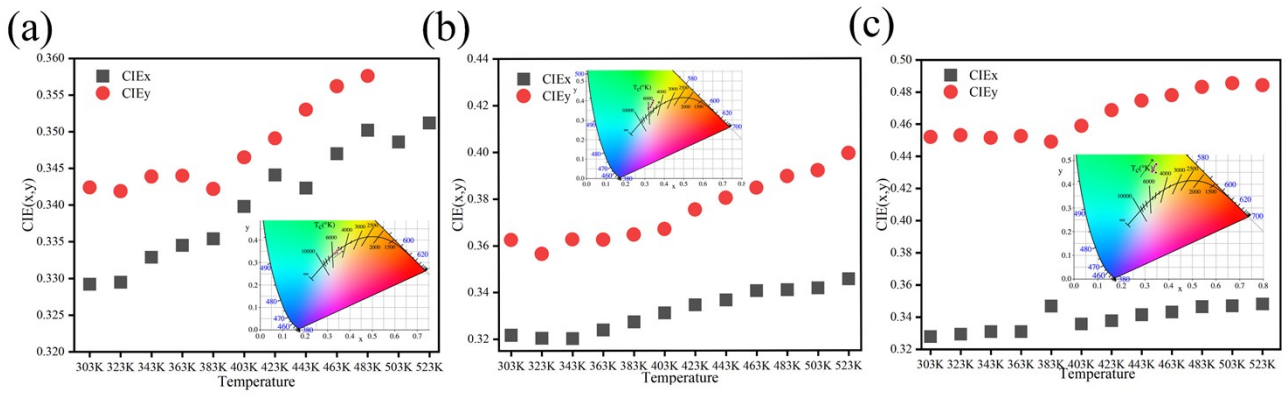

Figure S7 (a-c)  $Gd_{1-x}TaO_4:xTb^{3+}$  ( $x = 0.1\%$ ,  $0.5\%$ ,  $2\%$ ) in variable temperature chromaticity coordinates (x, y), and the insets are the corresponding CIE chromaticity diagrams.



**Figure S8**

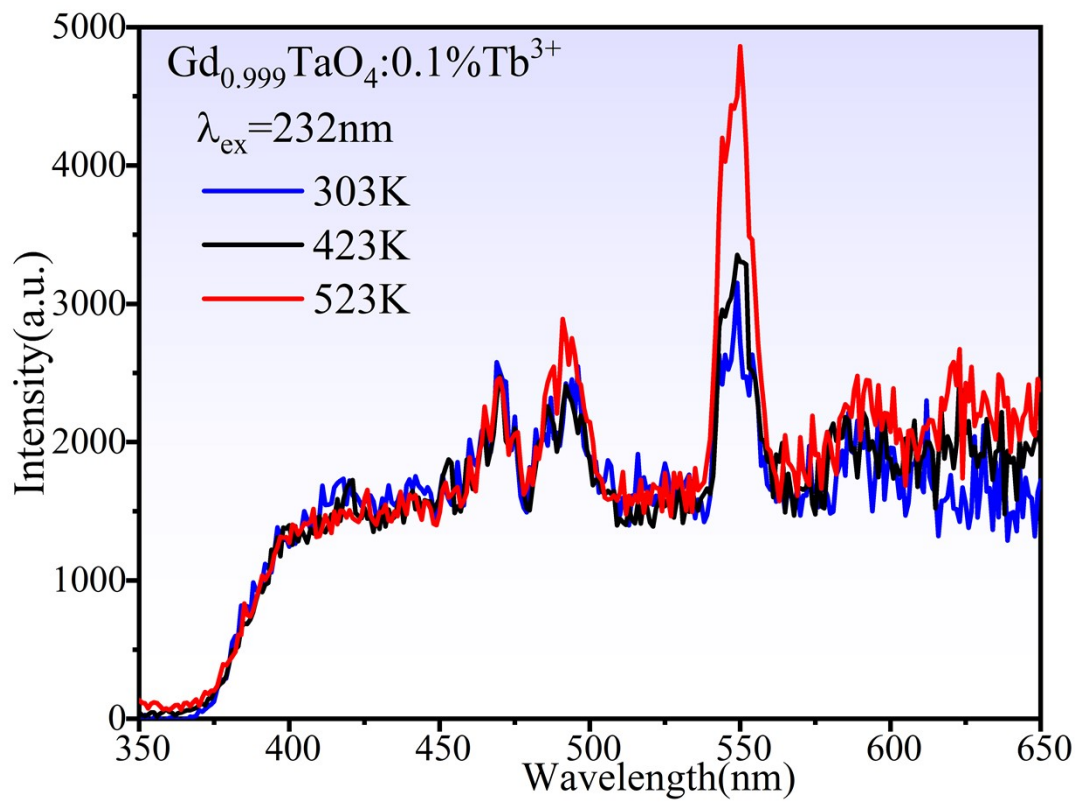

**Figure S8** Photoluminescence of  $\text{Gd}_{0.999}\text{TaO}_4:0.1\%\text{Tb}^{3+}$ .

**Figure S9**

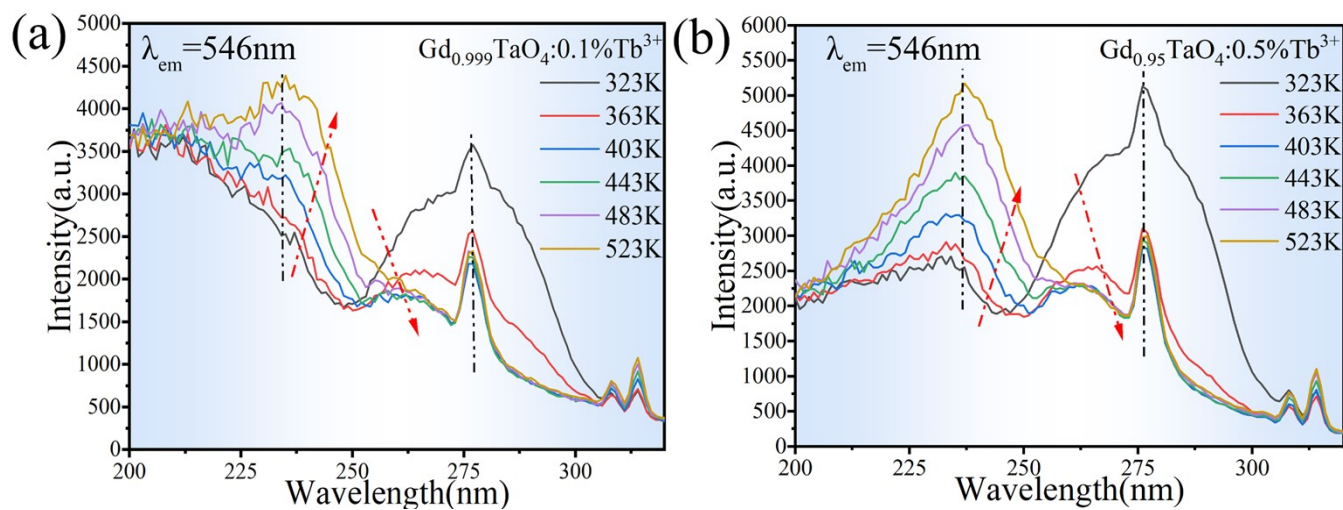

**Figure S9** Variable temperature excitation spectrum of  $\text{Gd}_{1-x}\text{TaO}_4:x\text{Tb}^{3+}$  ( $x = 0.1\%$ ,  $0.5\%$ ) under monitored excitation at 546 nm (a)  $x = 0.1\%$  (b)  $x = 0.5\%$ .

**Table S1** Data of moles of all reagents used in the synthesis of  $\text{Gd}_{1-x}\text{TaO}_4:x\text{Tb}^{3+}$  ( $x = 0.1\%, 0.5\%, 2\%$ ). and masses.

| <b>Samples prepared</b>                             | <b>raw materials</b>     | <b>relative molecular mass</b> | <b>mole number/mol</b> | <b>theoretical value/g</b> | <b>Actual weighing value/g</b> |
|-----------------------------------------------------|--------------------------|--------------------------------|------------------------|----------------------------|--------------------------------|
| $\text{Gd}_{0.999}\text{TaO}_4:0.1\%\text{Tb}^{3+}$ | $\text{Gd}_2\text{O}_3$  | 362.4982                       | 0.0050                 | 0.9053                     | 0.9052                         |
|                                                     | $\text{Ta}_2\text{O}_5$  | 441.8928                       | 0.0050                 | 1.1047                     | 1.1048                         |
|                                                     | $\text{Tb}_4\text{O}_7$  | 747.6972                       | 0.0050                 | 0.0009                     | 0.0009                         |
|                                                     | $\text{Li}_2\text{CO}_3$ | 73.8909                        | 0.0050                 | 0.0020                     | 0.0022                         |
| $\text{Gd}_{0.995}\text{TaO}_4:0.5\%\text{Tb}^{3+}$ | $\text{Gd}_2\text{O}_3$  | 362.4982                       | 0.0050                 | 0.9017                     | 0.9017                         |
|                                                     | $\text{Ta}_2\text{O}_5$  | 441.8928                       | 0.0050                 | 1.1047                     | 1.1044                         |
|                                                     | $\text{Tb}_4\text{O}_7$  | 747.6972                       | 0.0050                 | 0.0046                     | 0.0048                         |
|                                                     | $\text{Li}_2\text{CO}_3$ | 73.8909                        | 0.0050                 | 0.0020                     | 0.0022                         |
| $\text{Gd}_{0.98}\text{TaO}_4:2\%\text{Tb}^{3+}$    | $\text{Gd}_2\text{O}_3$  | 362.4982                       | 0.0050                 | 0.8881                     | 0.8882                         |
|                                                     | $\text{Ta}_2\text{O}_5$  | 441.8928                       | 0.0050                 | 1.1047                     | 1.1047                         |
|                                                     | $\text{Tb}_4\text{O}_7$  | 747.6972                       | 0.0050                 | 0.0187                     | 0.0185                         |
|                                                     | $\text{Li}_2\text{CO}_3$ | 73.8909                        | 0.0050                 | 0.0020                     | 0.0020                         |

**Table S2** The relevant Rietveld refinement parameters and crystallographic data.

| Parameter                          | Gd <sub>0.999</sub> TaO <sub>4</sub> :0.1%Tb <sup>3+</sup> | Gd <sub>0.995</sub> TaO <sub>4</sub> :0.5%Tb <sup>3+</sup> | Gd <sub>0.98</sub> TaO <sub>4</sub> :2%Tb <sup>3+</sup> |
|------------------------------------|------------------------------------------------------------|------------------------------------------------------------|---------------------------------------------------------|
| Space group                        | <i>I</i> 2/a                                               | <i>I</i> 2/a                                               | <i>I</i> 2/a                                            |
| Structure                          | Monoclinic                                                 | Monoclinic                                                 | Monoclinic                                              |
| a (Å)                              | 5.3541                                                     | 5.3478                                                     | 5.3508                                                  |
| b (Å)                              | 11.0199                                                    | 11.0108                                                    | 11.0083                                                 |
| c (Å)                              | 5.1620                                                     | 5.1579                                                     | 5.1633                                                  |
| $\alpha = \gamma$ (deg)            | 90.000                                                     | 90.000                                                     | 90.000                                                  |
| $\beta$ (deg)                      | 96.480                                                     | 96.506                                                     | 96.646                                                  |
| Unit cell volume (Å <sup>3</sup> ) | 302.623                                                    | 301.759                                                    | 302.090                                                 |
| R <sub>p</sub> (%)                 | 3.25                                                       | 3.03                                                       | 2.91                                                    |
| R <sub>wp</sub> (%)                | 4.49                                                       | 4.10                                                       | 3.81                                                    |
| $\chi^2$                           | 1.828                                                      | 1.888                                                      | 1.574                                                   |

**Table S3** The bond length in GSAS Refined Phosphors.

| Sample<br>(Bond<br>length(Å)) | Gd <sub>0.999</sub> TaO <sub>4</sub> :<br>0.1%Tb <sup>3+</sup> | Gd <sub>0.995</sub> TaO <sub>4</sub> :<br>0.5%Tb <sup>3+</sup> | Gd <sub>0.98</sub> TaO <sub>4</sub> :<br>2%Tb <sup>3+</sup> |
|-------------------------------|----------------------------------------------------------------|----------------------------------------------------------------|-------------------------------------------------------------|
| Ta-Tb <sup>3+</sup>           | 3.5029                                                         | 3.5013                                                         | 3.4972                                                      |
| Ta-Tb <sup>3+</sup>           | 3.9855                                                         | 3.9457                                                         | 3.9279                                                      |
| Ta-Tb <sup>3+</sup>           | 3.9230                                                         | 3.9457                                                         | 3.9943                                                      |
| Ta-Tb <sup>3+</sup>           | 3.9629                                                         | 3.9223                                                         | 3.9943                                                      |
| Ta-Tb <sup>3+</sup>           | 3.6648                                                         | 3.6737                                                         | 3.6320                                                      |
| Average                       | 3.8078                                                         | 3.7977                                                         | 3.8091                                                      |

**Table S4** The data of the lifetime of  $\text{Gd}_{1-x}\text{TaO}_4:x\text{Tb}^{3+}$  ( $x = 0.1\%, 0.5\%, 2\%$ ) under different excitations.

| Excitation wavelength | $\text{Gd}_{0.999}\text{TaO}_4:$<br>$0.1\%\text{Tb}^{3+}$ (ms) | $\text{Gd}_{0.995}\text{TaO}_4:$<br>$0.5\%\text{Tb}^{3+}$ (ms) | $\text{Gd}_{0.98}\text{TaO}_4:$<br>$2\%\text{Tb}^{3+}$ (ms) |
|-----------------------|----------------------------------------------------------------|----------------------------------------------------------------|-------------------------------------------------------------|
| 232 nm                | 1.301                                                          | 1.307                                                          | 1.249                                                       |
| 264 nm                | 2.425                                                          | 2.330                                                          | 1.165                                                       |
| 308 nm                | 1.419                                                          | 2.345                                                          | 1.157                                                       |

**Table S5** The data of  $I_{\text{abs}}$ , IQE and EQE on  $\text{Gd}_{1-x}\text{TaO}_4:x\text{Tb}^{3+}$  ( $x = 0.1\%$ ,  $0.5\%$ ,  $2\%$ ). ( $\lambda_{\text{ex}} = 264 \text{ nm}$ )

| Sample           | $\text{Gd}_{0.999}\text{TaO}_4:$<br>$0.1\%\text{Tb}^{3+}$ | $\text{Gd}_{0.995}\text{TaO}_4:$<br>$0.5\%\text{Tb}^{3+}$ | $\text{Gd}_{0.98}\text{TaO}_4:$<br>$2\%\text{Tb}^{3+}$ |
|------------------|-----------------------------------------------------------|-----------------------------------------------------------|--------------------------------------------------------|
| $I_{\text{abs}}$ | 60.35%                                                    | 60.71%                                                    | 55.71%                                                 |
| IQE              | 12.33%                                                    | 27.89%                                                    | 95.29%                                                 |
| EQE              | 7.44%                                                     | 16.93%                                                    | 53.09%                                                 |

**Table S6** The data of  $I_{\text{abs}}$ , IQE and EQE on  $\text{Gd}_{1-x}\text{TaO}_4:x\text{Tb}^{3+}$  ( $x = 0.1\%$ ,  $0.5\%$ ,  $2\%$ ). ( $\lambda_{\text{ex}}=308\text{nm}$ )

| Sample           | $\text{Gd}_{0.999}\text{TaO}_4:$<br>$0.1\%\text{Tb}^{3+}$ | $\text{Gd}_{0.995}\text{TaO}_4:$<br>$0.5\%\text{Tb}^{3+}$ | $\text{Gd}_{0.98}\text{TaO}_4:$<br>$2\%\text{Tb}^{3+}$ |
|------------------|-----------------------------------------------------------|-----------------------------------------------------------|--------------------------------------------------------|
| $I_{\text{abs}}$ | 25.60%                                                    | 32.15%                                                    | 27.60%                                                 |
| IQE              | 3.45%                                                     | 5.61%                                                     | 10.07%                                                 |
| EQE              | 0.88%                                                     | 1.80%                                                     | 2.78%                                                  |
